# Supplementary material for: Quality of life in a randomized phase II study to determine the optimal dose of 3-week cycle nab-paclitaxel in patients with metastatic breast cancer
Source: Research Square preprint supplement (doi:10.21203/rs.3.rs-178724/v2), 2021-05-12
Supplement: Supplementary file 1 [file 5904ae7aa597958ee5bf8030.xlsx]

## Sheet: Appendix TableA1
Appendix Table A1. Reasons for missing surveys
			SD 260 (n=44)			MD 220 (n=45)			LD 180 (n=47)
Course	Reasons for missing surveys		Number of patients	(%)		Number of patients	(%)		Number of patients	(%)
2nd course	Number of expected responses		43			44			46
	Number of responses collected		42	97.6744		43	97.7273		42	91.3043
	Number of missing surveys		1	2.32558		1	2.27273		4	8.69565
	Reasons for missing surveys
		Medical staff forgot to conduct the survey	1			1			3
		Exacerbation of medical condition	-			-			1
4th course	Number of expected responses		38			36			39
	Number of responses collected		36	94.7368		36	100		38	97.4359
	Number of missing surveys		2	5.26316		-			1	2.5641
	Reasons for missing surveys
		Medical staff forgot to conduct the survey	2			-			1
6th course	Number of expected responses		30			31			33
	Number of responses collected		29	96.6667		30	96.7742		31	93.9394
	Number of missing surveys		1	3.33333		1	3.22581		2	6.06061
	Reasons for missing surveys
		Missing questionnaire after distribution	1			1			2
Abbreviations: SD 260, 260 mg/m2 of 3-week cycle nab-paclitaxel; MD 220, 220 mg/m2 of 3-week cycle nab-paclitaxel; LD 180, 180 mg/m2 of 3-week cycle nab-paclitaxel.
