# Supplementary material for: Quality of life in a randomized phase II study to determine the optimal dose of 3-week cycle nab-paclitaxel in patients with metastatic breast cancer
Source: Research Square preprint supplement (doi:10.21203/rs.3.rs-178724/v2), 2021-05-12
Supplement: Supplementary file 4 [file 6b0ddb9f872a6c52a1638af8.xlsx]

## Sheet: Table 1
Table 1. Characteristics of patients in the quality of life sub-study
		Treatment
			SD 260			MD 220			LD 180			P value
Characteristic			(n=44)			(n=45)			(n=47)
Age (years)												0.82*
	mean (SD)		57.9	-9.1		58.4	-10.4		57.6	-10.3
Body mass index (kg/m2)												0.03*
	mean (SD)		25.2	-4.9		23.6	-3.9		22.3	-3.5
ECOG performance status, n (%)												0.26†
	0		36	-81.8		34	-75.6		31	-66
	1		8	-18.2		10	-22.2		16	-34
	Missing		-			1	-2.2		-
Estrogen receptor, n (%)												0.86†
	Negative		8	-18.2		10	-22.2		10	-21.3
	Positive		36	-81.8		34	-75.6		36	-76.6
	Unknown		-			1	-2.2		1	-2.1
Pre-treatment by chemotherapy, n (%)												0.77†
	No		13	-29.5		16	-35.6		17	-36.2
	Yes		31	-70.5		29	-64.4		30	-63.8
Pre-treatment by taxane, n (%)												0.89†
	No		26	-59.1		28	-62.2		30	-63.8
	Yes		18	-40.9		17	-37.8		17	-36.2
Comorbidity, n (%)												0.46†
	No		24	-54.5		22	-48.9		29	-61.7
	Yes		20	-45.5		23	-51.1		18	-38.3
NOTE. * Kruskal-Wallis test. † Chi-square test
Abbreviations: SD 260, 260 mg/m2 of 3-week cycle nab-paclitaxel; MD 220, 220 mg/m2 of 3-week cycle nab-paclitaxel; LD 180, 180 mg/m2 of 3-week cycle nab-paclitaxel; SD, standard deviation; ECOG, Eastern Cooperative Oncology Group.

## Sheet: Table 2
Table 2. Mean scores at each survey point
			Treatment group
			SD 260				MD 220				LD 180
			(n=44)				(n=45)				(n=47)
Questionnaire		Survey point	Number of responses, mean score (SD)												P value*
FACT-Taxane
	Taxane total	Baseline	44	124.73	-19.81		44	121.57	-18.38		47	122.8	-20.61		0.75
		2nd course	42	111.39	-21.03		42	117.4	-22.27		42	121.13	-20.56
		4th course	34	104.43	-22.79		36	115.58	-20.91		37	119.33	-20.83
		6th course	28	106.58	-23.06		30	117.47	-19.83		31	117.16	-23.98
	General total	Baseline	43	68.73	-15.89		44	66.96	-13.59		47	67.46	-15.93		0.86
		2nd course	42	64.71	-15.42		42	66.46	-14.99		42	67.25	-15.06
		4th course	34	62.09	-13.62		36	66.5	-13.87		37	69.53	-13.74
		6th course	28	64.75	-13.31		30	68.42	-15		31	69.16	-15.61
	Taxane TOI	Baseline	44	93.38	-14.6		44	90.64	(15.19)		47	91.43	-15.7		0.68
		2nd course	42	79.37	-17.71		42	86.2	-18.89		42	89.38	-16.35
		4th course	34	73.32	-19.29		36	83.7	-17.65		37	86.85	-17.61
		6th course	29	72.25	-22.42		30	85.19	-15.96		31	84.59	-18.3
	PWB	Baseline	44	20.22	-4.9		44	19.31	-5.38		47	18.59	-6.37		0.38
		2nd course	42	18.19	-5.15		43	19.98	-5.83		42	18.55	-5.69
		4th course	35	16.47	-4.87		36	19.37	-5.94		37	19.78	-5.27
		6th course	29	16.39	-5.73		30	19.6	-5.26		31	19.14	-6.05
	SFWB	Baseline	44	16.44	-6.23		44	18.92	-5.35		47	18.29	-6.12		0.13
		2nd course	42	16.24	-6.12		42	16.97	-6.26		42	17.41	-6.08
		4th course	35	15.5	-6.11		36	16.44	-6.04		37	16.28	-6.61
		6th course	28	16.3	-5.19		30	16.92	-6.71		31	16.88	-6.08
	EWB	Baseline	44	14.91	-5.62		45	11.99	-4.97		47	13.08	-6.03		0.05
		2nd course	42	15.77	-5.03		42	14.23	-5.59		42	14.34	-4.74
		4th course	34	15.56	-4.66		36	15.44	-4.95		37	16.21	-4.6
		6th course	29	15.88	-5.04		30	15.37	-5.12		31	15.69	-4.38
	FWB	Baseline	44	16.68	-6.78		45	16.70	-5.12		47	17.5	-5.43		0.74
		2nd course	42	14.5	-6.72		42	15.47	-5.88		42	16.95	-6.22
		4th course	34	14.47	(5.76)		36	15.25	-5.24		37	17.27	-5.39
		6th course	29	15.03	-5.91		30	16.53	-6.06		31	17.45	-5.3
	Taxane subscale	Baseline	44	56.48	-7.26		45	54.35	-8.98		47	55.34	-8.18		0.47
		2nd course	42	46.68	-10.19		43	51.1	-10.43		42	53.88	-9.46
		4th course	34	42.34	-12.26		36	49.08	-10.01		37	49.8	-10.94
		6th course	29	40.83	-13.56		30	49.05	-8.5		31	48	-10.2
EQ-5D Utility
		Baseline	44	0.75	(0.17)		45	0.74	(0.17)		46	0.69	(0.15)		0.24
		2nd course	42	0.67	(0.15)		43	0.76	(0.18)		42	0.72	(0.17)
		4th course	34	0.64	(0.15)		36	0.73	(0.18)		37	0.72	(0.17)
		6th course	29	0.67	(0.15)		30	0.72	(0.16)		31	0.72	(0.16)
CFS
	Total	Baseline	43	28.42	-6.19		44	28.08	-5.28		46	28.67	-6.2		0.89
		2nd course	42	31.52	-7.99		43	29.71	-5.55		42	28.68	-5.93
		4th course	34	30.44	-5.58		36	28.64	-5.25		37	28.05	-5.49
		6th course	29	31.44	-6.29		30	29.47	-5.22		31	28.65	-6.63
	Physical	Baseline	43	6.77	-5.36		44	6.15	-4.49		46	8.13	-5.87		0.19
		2nd course	42	9	-6.55		43	7.57	-5.25		42	8.6	-6.02
		4th course	34	9.24	-5.86		36	7.78	-4.57		37	7.89	-5.78
		6th course	29	10.15	-6.32		30	8.13	-5.1		31	8.55	-5.63
	Affective	Baseline	43	8.65	-3.12		44	8.61	-3.05		46	8.3	-3.71		0.86
		2nd course	42	9.24	-3.32		43	8.93	-2.76		42	8.02	-3.93
		4th course	34	9.03	-2.29		36	8.39	-3.39		37	8.05	-3.55
		6th course	29	8.91	-2.46		30	9	-2.89		31	8.06	-3.45
	Cognitive	Baseline	43	13	-2.73		44	13.32	-2.18		46	12.24	-2.88		0.14
		2nd course	42	13.29	-2.3		43	13.21	-2.63		42	12.06	-3.83
		4th course	34	12.18	-3.25		36	12.47	-3.08		37	12.11	-3.57
		6th course	29	12.38	-3.57		30	12.33	-3.34		31	12.03	-3.2
NOTE. * Baseline scores were compared by t-test. Abbreviations: SD, standard deviation; SD 260, 260 mg/m2 of 3-week cycle nab-paclitaxel; MD 220, 220 mg/m2 of 3-week cycle nab-paclitaxel; LD 180, 18 0mg/m2 of 3-week cycle nab-paclitaxel; FACT-Taxane, Functional Assessment of Cancer Therapy-Taxane; Taxane TOI, Taxane trial outcome index; PWB, physical well-being; SFWB, social and family well-being…
